# Supplementary material for: ATP-release pannexin channels are gated by lysophospholipids
Source: eLife. 2025 May 1;14:RP107067. doi: 10.7554/eLife.107067 (PMC12045621; doi:10.7554/eLife.107067)
Supplement: Figure 1—figure supplement 1—source data 1. [file elife-107067-fig1-figsupp1-data1.xlsx]

## Sheet: Fig. S1
Fig1.S1D
Empty vector
Cell ID	Capacitance (pF)	LPC-16:0 (7uM) (pA)	Current Density (pA/pF)
1	12.8	-2	-0.15625
2	9.8	-9	-0.918367
3	13.8	7	0.507246
4	13.5	0	0
5	17	1	0.0588235
6	9.2	7.6	0.826087
7	6.5	0	0
Average	11.8	0.657143	0.0453628
SEM	1.32539	2.12545	0.206823
Panx1
Cell ID	Capacitance (pF)	LPC-16:0 (7uM) (pA)	Current Density (pA/pF)
1	14.2	0	0
2	19	1	0.0526316
3	25.5	3	0.117647
4	16.6	-3	-0.180723
5	23	1	0.0434783
6	16	0	0
7	10.6	2	0.188679
Mean	17.8429	0.571429	0.0316733
SEM	1.93488	0.719032	0.0435725
Panx1+GS
Cell ID	Capacitance (pF)	LPC-16:0 (7uM) (pA)	Current Density (pA/pF)
1	10.2	96.6	9.47059
2	11.1	68.7	6.18919
3	8.2	143	17.439
4	8.9	338.5	38.0337
5	8.6	269.5	31.3372
6	9.6	173.6	18.0833
7	3	270.1	90.0333
8	8	215.8	26.975
9	15.8	145	9.17722
Mean	9.26667	191.2	27.4154
SEM	1.11567	29.6698	8.61293
Panx2
Cell ID	Capacitance (pF)	LPC-16:0 (7uM) (pA)	Current Density (pA/pF)
1	4.8	257.7	53.6875
2	8.6	308.3	35.8488
3	11	198.3	18.0273
4	8.2	65.2	7.95122
5	5.8	179.7	30.9828
6	16	336	21
7	16.5	222	13.4545
8	12.3	79	6.42276
9	13.6	140	10.2941
10	18.5	48	2.59459
11	9.8	72	7.34694
12	4.6	12	2.6087
13	12.5	80	6.4
14	6.3	83	13.1746
15	8.5	314	36.9412
16	14.6	242	16.5753
17	10.5	153	14.5714
18	13.8	110	7.97101
19	13.3	187	14.0602
Mean	11.0105	162.484	16.8375
SEM	0.934019	22.4444	3.10316
Panx2+GS
Cell ID	Capacitance (pF)	LPC-16:0 (7uM) (pA)	Current Density (pA/pF)
1	6.8	10	1.47059
2	11.5	-12	-1.04348
3	13.1	15	1.14504
4	7.8	20	2.5641
Mean	9.8	8.25	1.03406
SEM	1.49388	7.05189	0.75609
Panx3
Cell ID	Capacitance (pF)	LPC-16:0 (7uM) (pA)	Current Density (pA/pF)
1	8.2	0.3	0.0365854
2	9.7	0.6	0.0618557
3	9.2	3.7	0.402174
4	12.5	-1.5	-0.12
Mean	9.9	0.775	0.0951537
SEM	0.92105	1.07964	0.109959
Panx3+GS
Cell ID	Capacitance (pF)	LPC-16:0 (7uM) (pA)	Current Density (pA/pF)
1	7.6	-0.3	-0.0394737
2	8.3	2.4	0.289157
3	7.2	0.6	0.0833333
4	6.3	-0.6	-0.0952381
Mean	7.35	0.525	0.0594445
SEM	0.417333	0.675	0.0851713
LRRC8A
Cell ID	Capacitance (pF)	LPC-16:0 (7uM) (pA)	Current Density (pA/pF)
1	10.8	-5	-0.462963
2	14	2	0.142857
3	8.8	4	0.454545
4	18.3	1	0.0546448
5	15.2	1	0.0657895
6	18.2	-1	-0.0549451
Mean	14.2167	0.333333	0.0333215
SEM	1.57658	1.2561	0.121796
Conx43
Cell ID	Capacitance (pF)	LPC-16:0 (7uM) (pA)	Current Density (pA/pF)
1	8.2	0	0
2	6.8	7	1.02941
3	7.8	1	0.128205
4	4.3	1	0.232558
5	8.8	8	0.909091
6	10.6	-2	-0.188679
7	10	4	0.4
Mean	8.07143	2.71429	0.358655
SEM	0.795438	1.4094	0.172642
Inx6
Cell ID	Capacitance (pF)	LPC-16:0 (7uM) (pA)	Current Density (pA/pF)
1	17.8	3	0.168539
2	12.8	-2	-0.15625
3	18	8	0.444444
4	10.8	0	0
5	8.3	4	0.481928
6	14	1	0.0714286
7	11.8	-2	-0.169492
8	9.8	8	0.816327
Mean	12.9125	2.5	0.207116
SEM	1.25092	1.41421	0.122449
