# Supplementary material for: ATP-release pannexin channels are gated by lysophospholipids
Source: eLife. 2025 May 1;14:RP107067. doi: 10.7554/eLife.107067 (PMC12045621; doi:10.7554/eLife.107067)
Supplement: Figure 1—figure supplement 2—source data 1. [file elife-107067-fig1-figsupp2-data1.xlsx]

## Sheet: Fig. S2
Fig1. S2E
Panx1 response (pA) triggered by each fraction
Cell ID	Capacitance (pF)	Fraction number											Fraction # Current Density (pA/pF)
		1	2	3	4	5	6	7	8	9			1	2	3	4	5	6	7	8	9
1	10.8									4.6											0.425926
2	6					-14.3	4										-2.38333	0.666667
3	5.8					1.2	6.1										0.206897	1.05172
4	7					-5.8	-6	80									-0.828571	-0.857143	11.4286
5	16.2							119.3											7.3642
6	14.7					-2.4	-3.4	242.6									-0.163265	-0.231293	16.5034
7	10								76	0.6										7.6	0.06
8	9.6								24	3.4										2.5	0.354167
9	3.6	-11	-9.2	-2.1	-10.1	-0.3							-3.05556	-2.55556	-0.583333	-2.80556	-0.0833333
10	9.8	-22.3	-28.1	-2.4	-7.6	0.3							-2.27551	-2.86735	-0.244898	-0.77551	0.0306122
11	6.3	-0.9	-24.1	-0.3	-8.2	-5.5							-0.142857	-3.8254	-0.047619	-1.30159	-0.873016
12	6.2							254.2	21										41	3.3871
13	8.8							132.4	85.1										15.0455	9.67045
	Mean	-11.4	-20.4667	-1.6	-8.63333	-3.82857	0.175	165.7	51.525	2.86667		Mean	-1.82464	-3.08277	-0.29195	-1.62755	-0.584859	0.157489	18.2683	5.78939	0.280031
	SEM	6.18088	5.75046	0.655744	0.75351	2.03045	2.89608	34.8943	16.8713	1.18509		SEM	0.87052	0.382068	0.156427	0.608265	0.33848	0.432006	5.89878	1.70617	0.111949
Panx2 response (pA) triggered by each fraction
Cell ID	Capacitance (pF)	Fraction number											Fraction # Current Density (pA/pF)
		1	2	3	4	5	6	7	8	9			1	2	3	4	5	6	7	8	9
1	9.5	4.9	0.9	2.4	6.7	7.3							0.515789	0.0947368	0.252632	0.705263	0.768421
2	10.7					4.3	4										0.401869	0.373832
3	15.2									6											0.394737
4	13.2									0
5	15.8					2.7	10.4										0.170886	0.658228
6	9.7					1	9.2	353.2									0.103093	0.948454	36.4124
7	12							360	340	-4.6									30	28.3333	-0.383333
8	13	-7.9	0.9	1.8	7	7.6							-0.607692	0.0692308	0.138462	0.538462	0.584615
9	13.5	-3.4	-4.3	4	4.6	-1.8							-0.251852	-0.318519	0.296296	0.340741	-0.133333
10	5.3	4.9	-2.7	1.2	3.4	9.5							0.924528	-0.509434	0.226415	0.641509	1.79245
11	13.7								127											9.27007
12	14.4							314.9											21.8681
13	10.1								80											7.92079
14	9.2								89.1											9.68478
	Mean	-0.375	-1.3	2.35	5.425	4.37143	7.86667	342.7	159.025	0.466667		Mean	0.145193	-0.165996	0.228451	0.556494	0.526858	0.660171	29.4268	13.8022	0.00570175
	SEM	3.18103	1.31149	0.60208	0.860596	1.52405	1.96412	14.0379	61.1773	3.06884		SEM	0.349903	0.148472	0.033279	0.0797049	0.240099	0.165882	4.20835	4.85831	0.389035
Empty vector response (pA) triggered by each fraction
Cell ID	Capacitance (pF)	Fraction number											Fraction # Current Density (pA/pF)
		1	2	3	4	5	6	7	8	9			1	2	3	4	5	6	7	8	9
1	4.5							0.9	0.9										0.2	0.2
2	11.6								0.6											0.0517241
3	10.6							1.5	0										0.141509
4	11.3							0.9											0.079646
5	8.3							3.7											0.445783
	Mean							1.75	0.5			Mean							0.216735	0.125862
	SEM							0.343511	0.118322			SEM							0.041418	0.0280215
