# Supplementary material for: ATP-release pannexin channels are gated by lysophospholipids
Source: eLife. 2025 May 1;14:RP107067. doi: 10.7554/eLife.107067 (PMC12045621; doi:10.7554/eLife.107067)
Supplement: Figure 1—source data 1. [file elife-107067-fig1-data1.xlsx]

## Sheet: Fig.1
Fig. 1E					Fig. 1F					Fig. 1H
Empty vector; HEK293					Panx1					Panx1						Panx2
Cell ID	Capacitance (pF)	LPC-16:0 (pA)	Current Density (pA/pF)		Trial #	Vector LPC16-0	hPanx1 LPC16-0	hPanx1 LPC16-0 + CBX		NaCl	Cell ID	Capacitance (pF)	Peak current (pA)	Current Density (pA/pF)		NaCl	Cell ID	Capacitance (pF)	Peak current (pA)	Current Density (pA/pF)
1	12.8	-2	-0.15625		1	0.0168642	0.0517388	0.0267176			1	10.8	115	10.6481			1	4.8	257.7	53.6875
2	9.8	-9	-0.918367		2	0.00700935	0.0235828	0.00680272			2	12	17	1.41667			2	8.6	308.3	35.8488
3	13.8	7	0.507246		3	0.0109562	0.0289855	0.0057971			3	11.5	68	5.91304			3	11	198.3	18.0273
4	13.5	0	0		4	0.00822562	0.0394737	0.0179426			4	6.8	98	14.4118			4	8.2	65.2	7.95122
5	17	1	0.0588235		5	0.0198123	0.0384615	0.0288462			5	10.2	74	7.2549			5	5.8	179.7	30.9828
6	9.2	7.6	0.826087		6	0.0222105	0.055165	0.0308275			6	13.3	17	1.2782			6	16	336	21
7	6.5	0	0								7	10	127	12.7			7	16.5	222	13.4545
					Mean	0.0141797	0.0395679	0.0194889			8	12.4	2	0.16129			8	12.3	79	6.42276
Mean	11.8	0.657143	0.0453628		SEM	0.00258639	0.00503369	0.00454302			9	7.8	21	2.69231			9	13.6	140	10.2941
SEM	1.32539	2.12545	0.206823								10	8.8	207	23.5227			10	18.5	48	2.59459
											11	20.5	138	6.73171			11	9.8	72	7.34694
Panx1; HEK293					Panx2						12	10.5	32	3.04762			12	4.6	12	2.6087
Cell ID	Capacitance (pF)	LPC-16:0 (pA)	Current Density (pA/pF)		Trial #	Vector LPC16-0	hPanx2 LPC16-0	hPanx2 LPC16-0 + CBX			13	8.2	70	8.53659			13	12.5	80	6.4
1	14.2	0	0		1	0.0397767	0.0567766	0.0338828			14	7.8	164	21.0256			14	6.3	83	13.1746
2	19	1	0.0526316		2	0.0287462	0.039548	0.0289548			15	9.4	9	0.957447			15	8.5	314	36.9412
3	25.5	3	0.117647		3	0.0346389	0.0330661				16	10.3	46	4.46602			16	14.6	242	16.5753
4	16.6	-3	-0.180723		4	0.0458618	0.0901099				17	5.8	114	19.6552			17	10.5	153	14.5714
5	23	1	0.0434783		5	0.028071	0.0762281	0.0598532			18	10.6	101	9.5283			18	13.8	110	7.97101
6	16	0	0		6	0.0445647	0.0613027	0.0634921			19	10.2	346	33.9216			19	13.3	187	14.0602
7	10.6	2	0.188679		7	0.0210822	0.060969	0.0751225
					8	0.0231498	0.0640079	0.0689316		NMDG-Cl	Cell ID	Capacitance (pF)	Peak current (pA)	Current Density (pA/pF)		NMDG-Cl	Cell ID	Capacitance (pF)	Peak current (pA)	Current Density (pA/pF)
Mean	17.8429	0.571429	0.0316733								1	8.8	0	0			1	8.4	36	4.28571
SEM	1.93488	0.719032	0.0435725		mean	0.0332364	0.060251	0.0550395			2	9.5	18	1.89474			2	10.1	90	8.91089
					SEM	0.00335085	0.00646731	0.00778664			3	4.8	23	4.79167			3	11.8	114	9.66102
Panx2; HEK293											4	11.8	51	4.32203			4	11.6	35	3.01724
Cell ID	Capacitance (pF)	LPC-16:0 (pA)	Current Density (pA/pF)								5	6.6	18	2.72727			5	8.5	41	4.82353
1	4.8	257.7	53.6875								6	11.6	2	0.172414			6	12.2	145	11.8852
2	8.6	308.3	35.8488								7	7.2	16	2.22222			7	10.3	110	10.6796
3	11	198.3	18.0273								8	11.6	1	0.0862069			8	7.8	60	7.69231
4	8.2	65.2	7.95122								9	11.1	48	4.32432			9	6.5	139	21.3846
5	5.8	179.7	30.9828								10	7.8	108	13.8462			10	9.8	57	5.81633
6	16	336	21								11	5.6	49	8.75
7	16.5	222	13.4545
8	12.3	79	6.42276							NaGluc	Cell ID	Capacitance (pF)	Peak current (pA)	Current Density (pA/pF)		NaGluc	Cell ID	Capacitance (pF)	Peak current (pA)	Current Density (pA/pF)
9	13.6	140	10.2941								1	18	0	0			1	3.8	2	0.526316
10	18.5	48	2.59459								2	11.1	1	0.0900901			2	8.1	6	0.740741
11	9.8	72	7.34694								3	14.5	1	0.0689655			3	12.5	24	1.92
12	4.6	12	2.6087								4	10.8	-2	-0.185185			4	10.1	-8	-0.792079
13	12.5	80	6.4								5	10.1	3	0.29703			5	12.2	8	0.655738
14	6.3	83	13.1746								6	14.2	1	0.0704225			6	8.3	0	0
15	8.5	314	36.9412								7	10.7	1	0.0934579			7	3.8	2	0.526316
16	14.6	242	16.5753														8	5.7	7	1.22807
17	10.5	153	14.5714														9	13.5	9	0.666667
18	13.8	110	7.97101														10	4.8	11	2.29167
19	13.3	187	14.0602														11	11.8	14	1.18644
Mean	11.0105	162.484	16.8375
SEM	0.934019	22.4444	3.10316
Panx3; HEK293
Cell ID	Capacitance (pF)	LPC-16:0 (pA)	Current Density (pA/pF)
1	8.2	0.3	0.0365854
2	9.7	0.6	0.0618557
3	9.2	3.7	0.402174
4	12.5	-1.5	-0.12
Mean	9.9	0.775	0.0782828
SEM	0.92105	1.07964	1.17219
Empty vector; GnTi-
Cell ID	Capacitance (pF)	LPC-16:0 (pA)	Current Density (pA/pF)
1	8.8	5	0.568182
2	10.3	4	0.38835
3	5.8	3	0.517241
4	8.8	0	0
5	22.5	6	0.266667
6	12.8	4	0.3125
Mean	11.5	3.66667	0.342157
SEM	2.38886	0.843274	0.0831716
Panx1; GnTI
Cell ID	Capacitance (pF)	LPC-16:0 (pA)	Current Density (pA/pF)
1	10.8	115	10.6481
2	12	17	1.41667
3	11.5	68	5.91304
4	6.8	98	14.4118
5	10.2	74	7.2549
6	13.3	17	1.2782
7	10	127	12.7
8	12.4	2	0.16129
9	7.8	21	2.69231
10	8.8	207	23.5227
11	20.5	138	6.73171
12	10.5	32	3.04762
13	8.2	70	8.53659
14	7.8	164	21.0256
15	9.4	9	0.957447
16	10.3	46	4.46602
17	5.8	114	19.6552
18	10.6	101	9.5283
19	10.2	346	33.9216
Mean	10.3632	92.9474	9.88785
SEM	0.714643	19.1759	2.09063
Panx2; GnTI-
Cell ID	Capacitance (pF)	LPC-16:0 (pA)	Current Density (pA/pF)
1	8.9	376	42.2472
2	11	20	1.81818
3	15.2	53	3.48684
4	10.3	147	14.2718
5	9.6	197	20.5208
6	6.8	91	13.3824
7	9.2	116	12.6087
8	10.5	270	25.7143
9	7.8	105	13.4615
Mean	9.92222	152.778	16.3902
SEM	0.794211	37.3786	4.06174
Panx3; GnTI-
Cell ID	Capacitance (pF)	LPC-16:0 (pA)	Current Density (pA/pF)
1	5.8	5	0.862069
2	13	4	0.307692
3	3.8	8	2.10526
4	11	4	0.363636
5	7.8	15	1.92308
6	8	3	0.375
7	5	2	0.4
8	9.6	-1	-0.104167
Mean	8	5	0.779071
SEM	1.10259	1.69031	0.285241
