# Supplementary material for: ATP-release pannexin channels are gated by lysophospholipids
Source: eLife. 2025 May 1;14:RP107067. doi: 10.7554/eLife.107067 (PMC12045621; doi:10.7554/eLife.107067)
Supplement: Figure 2—figure supplement 1—source data 1. [file elife-107067-fig2-figsupp1-data1.xlsx]

## Sheet: Fig. S3
Fig. 2-S1A																				Fig2-S1B																				Fig2-S1C
Initial rate of fluroescent quenching for LPC 12-0																				Initial rate of fluroescent quenching for LPC 2 16-0																				Initial rate of fluroescent quenching for LPA-16:0
Trial number	Panx1 +LPC						Vector +LPC						Panx1 minus Vector							Trial number	Panx1 +LPC						Vector +LPC						Panx1 minus Vector							Trial number	Panx1 +LPC						Vector +LPC
	0uM	3uM	10uM	30uM	60uM	100uM	0uM	3uM	10uM	30uM	60uM	100uM	0uM	3uM	10uM	30uM	60uM	100uM			0uM	3uM	10uM	30uM	60uM	100uM	0uM	3uM	10uM	30uM	60uM	100uM	0uM	3uM	10uM	30uM	60uM	100uM			0uM	3uM	10uM	30uM	60uM	100uM	0uM	3uM	10uM
1		0.014098	0.011811	0.013289	0.021177	0.025862		0.003171	0.001472	0.000537	0.001287	0.000235		0.010927	0.010339	0.012752	0.01989	0.025627		1		0.0106188	0.0175769	0.0634125	0.106167	0.0960338		0.00249684	0.00516186	0.00526911	0.0202516	0.0218936		0.00812196	0.012415	0.0581434	0.0859157	0.0741403		1	0.00919826	0.00725741	0.00944121	0.0446331	0.0927951	0.117105	-0.000835889	-0.00583489	-0.010793
2		0.010528	0.007686	0.008504	0.011973	0.020024		0.00884	0.005478	-0.00329	0.002175	-0.00072		0.001688	0.002208	0.011795	0.009799	0.020748		2		0.00691092	0.0126154	0.0440171	0.103372	0.107007		0.00744504	0.0018109	0.00171667	0.0151975	0.0368909		-0.000534122	0.0108045	0.0423004	0.0881748	0.0701162		2		0.0117398	0.0121919	0.0396707	0.0775216	0.086554		-0.00133437	-0.00262267
3		0.007678	0.00929	0.010311	0.01029	0.038044		0.000537	0.002653	0.008249	0.005692	0.005299		0.007141	0.006637	0.002062	0.004598	0.032746		3		0.0141026	0.0343479	0.061806	0.128436	0.150581		0.00413284	0.0103376	0.00486734	0.0164026	0.0560728		0.0099698	0.0240103	0.0569387	0.112033	0.0945082		3		0.00794114	0.0106241	0.0269736	0.113954	0.134167		-0.00895097	-0.00332424
4		0.013347	0.010893	0.01801	0.027011	0.027184		0.008613	0.004856	0.003991	0.001178	0.004316		0.004734	0.006037	0.014019	0.025833	0.022868		4		0.0115443	0.0357288	0.0502013	0.0976707	0.15102		0.0116613	0.00488534	-0.00169054	0.0164649	0.046806		-0.000117038	0.0308435	0.0518918	0.0812059	0.104214		4		0.00919794	0.0157158	0.0580772	0.107399	0.133014		0.000243706	-0.00337961
																				5		0.00810327	0.0148986		0.0887627	0.12068		0.00568147	0.00318887		0.00578553	0.026618		0.0024218	0.0117097		0.0829772	0.0940618						0.060463
Mean		0.011413	0.00992	0.012528	0.017613	0.027779		0.00529	0.003615	0.002372	0.002583	0.002282		0.006122	0.006305	0.010157	0.01503	0.025497
SEM		0.001463	0.000909	0.002077	0.003942	0.003759		0.002056	0.000937	0.00246	0.00106	0.001485		0.001952	0.001664	0.002737	0.0048	0.002614		Mean		0.010256	0.0230335	0.0548592	0.104882	0.125064		0.0062835	0.00507691	0.00254064	0.0148204	0.0376562		0.00397248	0.0179566	0.0523186	0.0900614	0.087408
																				SEM		0.00127302	0.00496828	0.0046607	0.00659757	0.011209		0.00157475	0.00144828	0.00161864	0.00241326	0.00629992		0.00215202	0.00402246	0.00360347	0.00562193	0.00652748		Mean		0.00903407	0.0119933	0.0459635	0.0979174	0.11771		-0.00396913	-0.00502988
Initial rate of fluroescent quenching for LPC 14-0																																								SEM		0.00098737	0.00136274	0.0061602	0.00811018	0.0110909		0.00210138	0.00192875
Trial number	Panx1 +LPC						Vector +LPC						Panx1 minus Vector							Initial rate of fluroescent quenching for LPC 18-1
	0uM	3uM	10uM	30uM	60uM	100uM	0uM	3uM	10uM	30uM	60uM	100uM	0uM	3uM	10uM	30uM	60uM	100uM		Trial number	Panx1 +LPC						Vector +LPC						Panx1 minus Vector							Initial rate of fluroescent quenching for LPI-16:0
1	0.028444	0.029683	0.042936	0.133086	0.179165	0.177114	0.010228	0.006927	0.006757	0.008	0.090298	0.052806	0.018216	0.022755	0.036178	0.125086	0.088867	0.124308			0uM	3uM	10uM	30uM	60uM	100uM	0uM	3uM	10uM	30uM	60uM	100uM	0uM	3uM	10uM	30uM	60uM	100uM		Trial number	Panx1 +LPC						Vector +LPC
2	0.012914	0.016055	0.019863	0.078188	0.11388	0.078975	0.00986	0.007182	0.002806	0.001534	0.020248	0.026638	0.003054	0.008873	0.017057	0.076654	0.093632	0.052337		1	0.0240826	0.0301361	0.0210821	0.0697863	0.0924999	0.107983	0.00961783	0.00104041	-0.0102553	0.00649818	0.00300126	0.0155894	0.0144648	0.0290956	0.0313374	0.0632881	0.0894987	0.0923939			0uM	3uM	10uM	30uM	60uM	100uM	0uM	3uM	10uM
3	0.011708	0.011555	0.02167	0.086024	0.138205	0.162932	0.009463	0.006675	0.002384	0.008311	0.061663	0.046637	0.002245	0.00488	0.019286	0.077713	0.076542	0.116295		2	0.0105575	0.0125764	0.0382965	0.0471137	0.0953311	0.0910369	-0.00763041	-0.00849932	-0.00398202	-0.00867364	0.0117746	0.0237106	0.0181879	0.0210757	0.0422785	0.0557874	0.0835565	0.0673263		1	0.0171741	0.0117589	0.0451218	0.0443258	0.148777	0.166288	0.000392529	-0.00192988	0.00129167
4	0.004549	0.004799	0.017409	0.122665	0.169242	0.189377	0.003732	0.00346	0.000511	0.001644	0.021446	0.059568	0.000817	0.001339	0.016899	0.12102	0.147796	0.129808		3	0.0100731	0.0240567	0.0197972	0.0727626	0.126885	0.141091	-0.0104001	-0.00375562	0.0020889	-0.00237509	-0.000155242	0.024396	0.0204732	0.0278123	0.0177083	0.0751377	0.12704	0.116695		2	0.0157413	0.024543	0.015917	0.0711235	0.0883234	0.0964223	0.0018095	-0.0104414	-0.000145442
5		0.006504	0.023887	0.115156	0.190524	0.193862		0.002877	0.00328	0.007346	0.019869	0.059224		0.003627	0.020606	0.10781	0.170655	0.134638		4	0.01234	0.0159739	0.0155093	0.0831948	0.11963	0.176533	-0.00695452	0.00313397	0.00379319	0.00789583	0.00213399	0.0308467	0.0192946	0.01284	0.0117161	0.075299	0.117496	0.145687		3	0.0106881	0.0458032	0.0118389	0.041851	0.0890361	0.117022	0.00342014	-0.00115382	0.00184634
6		0.008474	0.026814	0.073825	0.190318	0.17029		0.000568	0.003394	0.001818	0.019396	0.061595		0.007906	0.02342	0.072007	0.170922	0.108695		5		0.0283558	0.0454362		0.1308	0.17495		-0.00182406	0.000695472		0.0120498	0.0402511		0.0301799	0.0447407		0.11875	0.134699		4		0.0416025	0.0566817	0.0891845	0.0786541	0.0729536		-0.000755251	-0.00725558
7					0.143956						0.021686						0.12227			6			0.0382375			0.177054			0.000156388			0.0405357			0.0380811			0.136519		5			0.0507692		0.0958914				-0.00931505
																																								6
																				Mean	0.0142633	0.0222198	0.0297265	0.0682144	0.113029	0.144775	-0.00384179	-0.00198092	-0.00125056	0.000836318	0.00576087	0.0292216	0.0181051	0.0242007	0.030977	0.0673781	0.107268	0.115553		7
Mean	0.014404	0.012845	0.02543	0.101491	0.160756	0.162092	0.008321	0.004615	0.003189	0.004776	0.036372	0.051078	0.006083	0.00823	0.022241	0.096715	0.124383	0.111014		SEM	0.00330919	0.00343292	0.00506004	0.00759829	0.00801877	0.0155092	0.00454803	0.00201189	0.00208889	0.00390134	0.00256403	0.00404884	0.00130005	0.00325259	0.00552208	0.00477863	0.00867575	0.0123526
SEM	0.005031	0.00374	0.003743	0.010297	0.011083	0.017278	0.001538	0.001109	0.000832	0.001397	0.010698	0.005382	0.004071	0.003117	0.002958	0.00982	0.014925	0.012335
																				Initial rate of fluroescent quenching for LPC 18-2																				Mean	0.0145345	0.0309269	0.0360657	0.0616212	0.100136	0.113172	0.00187406	-0.00357008	-0.00271561
Initial rate of fluroescent quenching for LPC 16-0																				Trial number	Panx1 +LPC						Vector +LPC						Panx1 minus Vector							SEM	0.00196718	0.00787105	0.00926318	0.0113285	0.0124662	0.0198625	0.000874591	0.00230338	0.00231991
Trial number	Panx1 +LPC						Vector +LPC						Panx1 minus Vector								0uM	3uM	10uM	30uM	60uM	100uM	0uM	3uM	10uM	30uM	60uM	100uM	0uM	3uM	10uM	30uM	60uM	100uM
	0uM	3uM	10uM	30uM	60uM	100uM	0uM	3uM	10uM	30uM	60uM	100uM	0uM	3uM	10uM	30uM	60uM	100uM		1		0.00444117	0.00369915	0.0250938	0.0426691	0.0731611		-0.00305002	-0.00390018	-0.00520481	-0.00758231	-0.00201355		0.0074912	0.00759934	0.0302986	0.0502514	0.0751747		Initial rate of fluroescent quenching for LPE-16:0
1	0.022974	0.023306	0.023815	0.059147	0.034499	0.093074	0.017011	0.013083	0.008057	0.012334	0.014075	0.011094	0.005962	0.010223	0.015758	0.046813	0.072818	0.065106		2		0.00484057	0.00597247	0.0266366	0.0430703	0.0626435		-0.00203234	-0.00213931	-0.00206652	-0.0126952	0.00160513		0.00687291	0.00811177	0.0287032	0.0557655	0.0610384		Trial number	Panx1 +LPC						Vector +LPC
2	0.021994	0.020477	0.033368	0.064398	0.124321	0.144525	0.015345	0.011611	0.008385	0.015096	0.022492	0.028515	0.006649	0.008866	0.024983	0.049302	0.110243	0.133435		3		0.0151638	0.0433145	0.0610454	0.0449727	0.093855		0.00275957	-0.00237216	0.00191644	-0.00426338	0.008116		0.0124042	0.0456867	0.0591289	0.049236	0.085739			0uM	3uM	10uM	30uM	60uM	100uM	0uM	3uM	10uM
3	0.021823	0.024049	0.038992	0.062525	0.095311	0.093623	0.018211	0.011823	0.013034	0.016973	0.002726	0.00353	0.003611	0.012226	0.025959	0.045552	0.065787	0.052073		4		0.039993	0.0305666	0.0616366	0.0519947	0.0850134		-0.000467403	-0.00367027	-0.00110822	-0.00485173	0.0106342		0.0404604	0.0342368	0.0627449	0.0568464	0.0743791		1	0.0086461	0.00675541	0.00894996	0.0109435	0.0140144	0.01353	0.00629727	0.00307625	0.000868182
4	0.001762	0.02454	0.014854	0.071968	0.068513	0.055603	0.00143	0.000348	-0.00243	0.00866	0.007556	0.036079	0.000332	0.024192	0.017279	0.063308	0.067572	0.087703		5		0.0147644	0.0184997	0.0454604	0.114764	0.0708753		0.00408009	0.00227827	0.00729105	0.00986621	0.0226082		0.0106843	0.0162214	0.0381694	0.104898	0.0482671		2	0.0184571	0.0203632	-0.00704075	0.0219382	0.0211499	0.0249598	0.00341404	-0.011925	-0.0173297
5			0.020262	0.050571	0.075128	0.123783			0.001878	0.004254	0.002165	0.012322			0.018384	0.046316	0.048374	0.076616		6		0.0121911	0.0225635	0.0452369	0.0661032	0.0755883		0.00411599	0.000103064	0.00393976	0.00622773	0.0223688		0.00807515	0.0224605	0.0412971	0.0598755	0.0532195		3	0.0274463	0.0224434	-0.0052577	0.0268016	0.032	0.0299764	0.00145852	-0.0175656	-0.0136123
6				0.05468	0.050539	0.088938				0.006154	-0.00099	0.008848				0.048527	0.06647	0.083011		7		0.00150635	0.00614212	0.0308494	0.0600687	0.116479		0.00195278	0.00260604	0.0060789	0.00818958	0.0371383		-0.000446433	0.00353608	0.0247705	0.0518792	0.0793408		4	0.00607527	0.0162599		-0.00102785	-0.000443887	0.000499145	-0.0108447	-0.0040241
7				0.071277	0.065476	0.091859				0.002545	0.008685	0.004951				0.068732	0.070553	0.0673		8			0.0191186	0.0324747	0.0444567				0.0116337	0.00433228	0.00792757				0.00748487	0.0281424	0.0365291
8				0.069957	0.079238	0.072251				0.010064	0.000726	0.020456				0.059893	0.073449	0.11547		9			0.0157725	0.0468204	0.0669867				0.00891137	0.00865207	0.00390301				0.00686113	0.0381683	0.0630837
9				0.066122	0.074175					0.008228	-9.3e-05					0.057894	0.09394			10				0.0394379	0.0876322					0.00785711	0.0163074					0.0315808	0.0713249			Mean	0.0151562	0.0164555	-0.00111616	0.0146639	0.0166801	0.0172413	8.12789e-05	-0.0076096	-0.0100246
10				0.043462	0.093847					0.004764	0.004128					0.038697	0.088946			11					0.0673212						0.0154792						0.051842			SEM	0.00488866	0.00347916	0.00505931	0.00619349	0.00680083	0.00655637	0.00377514	0.00451652	0.00555111
11				0.053757						0.002618						0.051139
12				0.051978						0.005352						0.046625																								Initial rate of fluroescent quenching for SPC-18:1
13				0.040677						0.00366						0.037018				Mean		0.0132715	0.0184055	0.0414692	0.0627308	0.0825165		0.00105124	0.0014945	0.00316881	0.00350073	0.014351		0.0122203	0.016911	0.0383004	0.0592301	0.0681655		Trial number	Panx1 +LPC						Vector +LPC
14				0.048891						-0.00677						0.055665				SEM		0.00490017	0.00427255	0.0041294	0.00670056	0.00682123		0.00110122	0.00184666	0.0014789	0.00287999	0.00519769		0.00494851	0.00484821	0.00412028	0.00528222	0.00532643			0uM	3uM	10uM	30uM	60uM	100uM	0uM	3uM	10uM
15				0.042364						-0.00871						0.051072																								1	0.0157413	0.00145851	0.0105855	0.102405	0.0570541	0.0508389	0.0018095	-0.0106435	0.0028631
16				0.039985						0.002539						0.037446																								2	0.0106881	0.00372294	0.0133846	0.10339	0.0712562	0.0901081	0.00342014	-0.0186729	0.00142524
17				0.034499						-0.00534						0.039837																								3	0.00301376	0.00118869	0.00311439	0.0387069	0.0980152	0.128813	0.00452743	-0.010654	5.83913e-06
																																								4	0.00590249	0.00398438	0.00745037	0.0501013	0.144369	0.144299	0.00487905	-0.0204609	0.00272645
																																								5	0.00998082		0.0155918	0.0852517	0.156036		0.00557225		-0.00491792
Mean	0.017138	0.023093	0.026258	0.054486	0.076105	0.095457	0.013	0.009216	0.005786	0.004848	0.006147	0.015724	0.004139	0.013877	0.020473	0.049638	0.075815	0.085089																						6	0.00742052		0.0262194	0.0949605			0.00261758		-0.00614195
SEM	0.005132	0.000908	0.004386	0.002888	0.007873	0.009821	0.003901	0.002974	0.002712	0.001718	0.002332	0.004109	0.001426	0.003507	0.002088	0.002216	0.005515	0.009589
Initial rate of fluroescent quenching for LPC 18-0																																								Mean	0.00879116	0.00258863	0.0127244	0.0791359	0.105346	0.103515	0.00380432	-0.0151078	-0.000673207
Trial number	Panx1 +LPC						Vector +LPC						Panx1 minus Vector																											SEM	0.0017974	0.000734382	0.00324302	0.0113945	0.0195451	0.0209321	0.000587049	0.00260019	0.00160055
	0uM	3uM	10uM	30uM	60uM	100uM	0uM	3uM	10uM	30uM	60uM	100uM	0uM	3uM	10uM	30uM	60uM	100uM
1	0.024083	0.023827	0.013156	0.045044	0.069454	0.078819	0.023827	0.009618	0.000175	0.002376	0.000545	0.019454	0.000255	0.014209	0.012981	0.042668	0.068909	0.059365
2	0.021813	0.016168	0.018329	0.024122	0.061645	0.126694	0.001261	-0.00234	0.001555	-0.00205	0.001031	0.017396	0.020552	0.018511	0.016774	0.026174	0.060614	0.109298
3	0.010073	0.019573	0.012874	0.020597	0.115456	0.143424	-0.0104	0.003157	0.002776	0.003121	0.007476	0.020761	0.020473	0.016416	0.010098	0.017475	0.10798	0.122664
4		0.00952	0.010806	0.028108	0.083259	0.107423		-0.00219	-0.01002	0.003025	0.000916	0.018553		0.011706	0.020823	0.025082	0.082343	0.088871
Mean	0.018656	0.017272	0.013791	0.029468	0.082454	0.11409	0.004896	0.002061	-0.00138	0.001618	0.002492	0.019041	0.01376	0.015211	0.015169	0.02785	0.079961	0.095049
SEM	0.004341	0.003022	0.001601	0.005414	0.011874	0.013868	0.010046	0.002825	0.002928	0.001234	0.001665	0.000711	0.006752	0.001462	0.002328	0.005305	0.010357	0.013775
Initial rate of fluroescent quenching for LPC 20-0
Trial number	Panx1 +LPC						Vector +LPC						Panx1 minus Vector
	0uM	3uM	10uM	30uM	60uM	100uM	0uM	3uM	10uM	30uM	60uM	100uM	0uM	3uM	10uM	30uM	60uM	100uM
1		0.012862	0.013142	0.017051	0.023279	0.024372		0.009834	0.007727	0.005833	0.00109	0.003982		0.003028	0.005415	0.011218	0.022189	0.02039
2		0.018615	0.014211	0.01542	0.018643	0.039781		0.005228	0.004149	0.003211	0.005977	0.00824		0.013388	0.010062	0.012208	0.012666	0.031541
3		0.018436	0.017295	0.029214	0.03714	0.03269		0.010498	0.010232	0.006582	0.005627	0.00612		0.007937	0.007063	0.022632	0.031513	0.026569
4		0.009113	0.014773	0.018053	0.019921	0.017826		-0.00894	-0.00233	0.008326	0.007883	-0.00907		0.018052	0.017105	0.009726	0.012038	0.026896
Mean		0.014756	0.014855	0.019934	0.024746	0.028667		0.004155	0.004944	0.005988	0.005144	0.002318		0.010601	0.009911	0.013946	0.019601	0.026349
SEM		0.002307	0.000881	0.00314	0.004246	0.004793		0.004519	0.002728	0.001063	0.001439	0.003894		0.003263	0.002584	0.00294	0.0046	0.002288
[truncated: 81 more columns]
