# Supplementary material for: ATP-release pannexin channels are gated by lysophospholipids
Source: eLife. 2025 May 1;14:RP107067. doi: 10.7554/eLife.107067 (PMC12045621; doi:10.7554/eLife.107067)
Supplement: Figure 2—source data 1. [file elife-107067-fig2-data1.xlsx]

## Sheet: Fig.2
Fig. 2C					Fig. 2E					Fig. 2F														Fig. 2G
Trial number	Vct	Panx1	Panx1 +CBX		Trial number	Vct	Panx2	Panx2 +CBX			Panx1 Initial rates with 60 uM lysophospholipids (GnTI- cells; vector control subtracted)														Panx2 Initial rates with 60 uM lysophospholipids (HEK cells; vector control subtracted)
1	0.006154	0.05468	0.0200043		1	0.0186506	0.0750557	0.0455799			ND	LPC12:0	LPC14:0	LPC16:0	LPC18:0	LPC20:0	LPC2-16:0	LPC18:1	LPA16:0	LPI16:0	LPE16:0	SPC18:1			ND	LPC12:0	LPC14:0	LPC16:0	LPC18:0	LPC20:0	LPC2-16:0	LPC18:1	LPA16:0	LPI16:0	LPE16:0	SPC18:1
2	0.012332	0.059147	0.0249389		2	0.0144723	0.0350324	0.0712718			0.0101357	0.0198903	0.0888668	0.0728177	0.068909	0.0221885	0.0859157	0.0894987	0.0954792	0.129208	0.0106976	0.0544958			0.023486	0.00504363	0.0503935	0.0537161	0.0293395	0.00223582	0.0495465	0.0460499	0.0214718	0.0477921	0.00980926	0.0644161
3	0.016973	0.062525	0.0430477		3	0.0263617	0.0354719	0.0745404			0.0121974	0.00979853	0.0936319	0.110243	0.0606141	0.0126658	0.0881748	0.0835565	0.0735729	0.0853529	0.0198268	0.0623688			0.026137	-0.000713307	0.0642275	0.0805781	0.0470182	0.0101599	0.0593933	0.0631977	0.0288131	0.0423798	0.00577696	0.0420523
4	0.00866	0.071968	0.0475322		4	0.0119746	0.0616254	0.076513			0.0103398	0.00459777	0.0765418	0.0657869	0.10798	0.0315135	0.112033	0.12704	0.110391	0.0865664	0.0286546	0.0886163			0.025557	0.0126991	0.0628049	0.0425544	0.0442481	0.006119	0.0776173	0.0768233	0.0235133	0.0459376	-0.000145661	0.05684
5	0.004254	0.050571	0.0327851		5	0.0107786	0.0581613				0.0163446	0.0258334	0.147796	0.0675722	0.082343	0.0120382	0.0812059	0.117496	0.0991203	0.0879626	0.00996216	0.135507			0.03251	0.01129	0.0577034	0.0333587	0.0360728	0.0230983	0.0695577	0.0678527	0.0462171	0.0579754	0.00562979	0.0546133
6	0.015099	0.064401	0.0378114		6	0.0137971	0.0604547				0.00594632		0.170655	0.048374			0.0829772	0.11875		0.0995934		0.133843			0.01886		0.0460499	0.0292025					0.0648311	0.0398383
7	0.004437	0.071277	0.0428639		7	0.0119976	0.0409707				0.018547		0.170922	0.0664699											0.020474			0.0197845					0.0618242	0.0577748
8	0.010064	0.069957	0.0380457		8	0.00476931	0.038225				0.0042246		0.12227	0.0705532											0.020433								0.0662973	0.0480376
9	0.008228	0.066122			9	0.0205867	0.0554361				0.0045593			0.073449											0.010102
10	0.004764	0.043462									0.00912751			0.0939405
11	0.002618	0.053757			Mean	0.0148209	0.0511592	0.0669763			0.0310958			0.0889465										Mean	0.0221949	0.00707986	0.0562358	0.043199	0.0391697	0.0104033	0.0640287	0.0634809	0.0447097	0.0485336	0.00526759	0.0544804
12	0.005352	0.051978			SEM	0.00209403	0.00473106	0.00721355			0.01692													SEM	0.00230813	0.00308465	0.00351467	0.0088491	0.00401676	0.00453031	0.00609944	0.00646177	0.00757198	0.00265276	0.00204778	0.00464365
13	0.00366	0.040677
14	-0.00677	0.048891								Mean	0.0126762	0.01503	0.124383	0.0758153	0.0799615	0.0196015	0.0900614	0.107268	0.0946409	0.0977366	0.0172853	0.0949663
15	-0.00871	0.042364								SEM	0.00235981	0.00480048	0.0149248	0.00551498	0.0103569	0.00459978	0.00562193	0.00867575	0.0077066	0.00826907	0.00440405	0.0171694
Mean	0.005808	0.056785	0.0358786
SEM	0.001793	0.002743	0.00334255
