# Supplementary material for: ATP-release pannexin channels are gated by lysophospholipids
Source: eLife. 2025 May 1;14:RP107067. doi: 10.7554/eLife.107067 (PMC12045621; doi:10.7554/eLife.107067)
Supplement: Figure 3—source data 1. [file elife-107067-fig3-data1.xlsx]

## Sheet: Fig. 3
Fig. 3A and C
	Label	Panx1 + LPC	Panx1 + LPC	Panx1 + LPC	Panx1 + LPC	Panx1 + Veh	Panx1 + Veh	Panx1 + Veh	Panx1 + Veh	Vec + LPC	Vec + LPC	Vec + LPC	Vec + LPC	Vec + Veh	Vec + Veh	Vec + Veh	Vec + Veh
	5'-Methylthioadenosine	59460.4	64875.4	42626.4	61330.7	78.7532	9487.4	27597.3	3551.79	2312.44	78.7532	4905.48	6656.87	78.7532	78.7532	4099.59	466.528
	Glutamate	6.98364e+06	4.49743e+06	6.71087e+06	5.14091e+06	582711	4.85145e+06	3.89804e+06	1.68513e+06	1.78113e+06	868152	2.36169e+06	1.64869e+06	434669	195659	1.21314e+06	394413
	Fumarate	79339.8	43216.2	59838.3	43363	6812.92	39894.5	31425.4	19457.4	16950.2	14325	19255.2	23550.9	16961	16042.2	20758.1	11637
	G3P	183165	95969.3	188583	126593	7655.94	67225.9	74878.2	27393.9	63600	21626.8	41455.9	46995.2	27295.1	23193.5	52910.2	22181.3
	Malate	93416.7	74273.6	44146.1	85513.2	7596.82	37194.7	64136.6	28008.4	19491.8	12627	20403.2	27315.6	8681.01	10080.4	25036.1	22987.6
	Ketoglutarate	207178	122205	188005	135123	4708.97	67190.2	81425.9	30007.2	18170.8	8685.63	20785.2	21321.4	10309.6	10119.3	23919.8	11816.3
	UDP	83321.4	50852.3	85393.1	64800.3	3645.56	33297.6	24303.1	12919.5	25276.5	12627.7	29817.3	19499.3	6840.72	78.7532	14101.1	7924.35
