# Supplementary material for: ATP-release pannexin channels are gated by lysophospholipids
Source: eLife. 2025 May 1;14:RP107067. doi: 10.7554/eLife.107067 (PMC12045621; doi:10.7554/eLife.107067)
Supplement: Figure 4—figure supplement 1—source data 1. [file elife-107067-fig4-figsupp1-data1.xlsx]

## Sheet: Fig. S4
Fig.4-S1D					Fig.4-S1G						Fig.4-S1H
	YOPRO-updake initial rate					YOPRO-updake initial rate
Trial#	Vector	hPanx1	hPanx1+CBX		Trial#	Vector	frPanx1 alone	frPanx1+ LPC	frPanx1+LPC + SPL		Initial rate of YO-PRO-1 uptake of liposome reconstituted Panx1 triggered by LPC 16-0
1	0.0006353	0.0020605	0.00070515		1	0.0554436	0.0877965	0.318181	0.157788		Trial number	Panx1 +LPC						Liposomes +LPC
2	0.00050947	0.0066249	0.0012225		2	0.122627	0.0829786	0.290276	0.153223				10uM	30uM	60uM	100uM	300uM		10uM	30uM	60uM	100uM	300uM
3	0.00056814	0.0041231	0.0012593		3	0.129553	0.0919194	0.297606	0.202096		1		0.29262	0.367915	0.476567	0.448925	0.887713		0.00413322	0.00884508	0.0114817	0.0113813	0.0126535
4	0.00035489	0.0021513	0.00063903		4	0.135264	0.0767434	0.357612	0.170004		2		0.411032	0.443515	0.647506	0.625205	0.680869		0.0178538	0.0183695	0.0075323	0.00811487	0.00926073
5	0.00036584	0.0021729	0.0006302		5	0.133821	0.0714654	0.265801	0.177255		3		0.279661	0.341488	0.369156	0.458889	0.497137		0.00842903	0.0142535	0.00970575	0.00456392	0.0162585
6	0.00057843	0.0054001	0.00067565		6	0.132693		0.336455			4		0.362827	0.477671	0.619173	0.679744	0.848497		0.0134801	0.0146914	0.0166055	0.00121563	0.0232109
7	0.00058841	0.0040884	0.00061446		7	0.146193		0.387134			5		0.35995	0.350844	0.634158	0.714212	0.828118		0.00539937	0.000886467	0.00522472	-0.00211901	-0.00468129
					8	0.144946		0.387218			6		0.346102	0.463095	0.538787	0.678916	0.812325		0.00788586	0.0167766	0.0104013	-0.000659795	0.00743232
					9	0.134846		0.428105			7		0.199135	0.250109	0.322875	0.604196	0.728872		0.0220539	0.0167727	0.00588105	-0.00599008	0.00188972
											8		0.210669	0.233017	0.264131	0.417128	0.617308		0.0227532	0.00942711	0.0125971	0.0134172	-0.000138122
											9		0.16872	0.231013	0.303269	0.397811	0.486289		0.0194015	0.0169268	0.00873282	0.00688074	0.0143891
											10								0.0177026	-0.00134057	-0.00566363	0.023679	0.00259381
											11								0.0047757	-0.00209725	0.0121219	-0.00152216	0.00587866
											Mean		0.292302	0.350963	0.463958	0.558336	0.709681		0.0130789	0.0103192	0.00860186	0.00536015	0.00806798
											SEM		0.0282149	0.0324984	0.0509836	0.0421175	0.0500469		0.00216373	0.00235193	0.00172846	0.00258111	0.00245323
