# Supplementary material for: ATP-release pannexin channels are gated by lysophospholipids
Source: eLife. 2025 May 1;14:RP107067. doi: 10.7554/eLife.107067 (PMC12045621; doi:10.7554/eLife.107067)
Supplement: Figure 4—source data 1. [file elife-107067-fig4-data1.xlsx]

## Sheet: Fig. 4
Fig. 4B						Fig. 4C
Trial number	Panx1	Panx1 +LPC	Panx1 +LPC +CBX	Empty liposome +LPC		LPC dose dependent initial rate of YO-PRO-1 uptake from Panx1 liposomes
1	0.042129	0.1113	0.032147	0.011381		[LPC] (uM)	Trial 1	Trial 2	Trial 3	Trial 4	Trial 5	Trial 6	Trial 7	Trial 8	Trial 9	Trial 10	Trial 11	Average	SEM
2	0.060401	0.07995	0.01977	0.0081149		0	0.0644467	0.0624905	0.0811849	0.0782473	0.073495	0.0329421	0.0629159					0.0651032	0.00607138
3	0.054706	0.08844	-0.0036457	0.0045639		10	0.0779719	0.113615	0.080533	0.0922504	0.0691659	0.120108	0.0900238	0.0393807	0.0772989			0.084483	0.00798195
4	0.064447	0.109206	0.02316	0.0012156		30	0.125785	0.0770784	0.0850658	0.0962128	0.0939974	0.0696257	0.0856168	0.105524	0.0789514	0.0443752	0.0956443	0.0870797	0.0062838
5	0.062491	0.0935985	-0.02153	-0.002119		60	0.104502	0.118357	0.0947198	0.143479	0.0835832	0.091597	0.0767916	0.0508216	0.0990458			0.0958774	0.00867686
6	0.081185	0.0902492	0.0055936	-0.00065979		100	0.109206	0.0935985	0.0902492	0.0894147	0.109522	0.0939476	0.105645	0.107598	0.140554	0.0906468	0.091511	0.10199	0.00458294
7	0.078247	0.0894147		-0.0059901		300	0.12766	0.106563	0.0966143	0.144789	0.161922	0.140766	0.15478	0.175486	0.143225	0.0717174	0.0886987	0.128384	0.00997947
8	0.073495	0.109522		0.013417
9	0.032942	0.0939476		0.0068807
10	0.062916	0.105645		0.023679
11		0.107598		-0.0015222		LPC dose dependent initial rate of YO-PRO-1 uptake from empty liposomes
12		0.140554				[LPC] (uM)	Trial 1	Trial 2	Trial 3	Trial 4	Trial 5	Trial 6	Trial 7	Trial 8	Trial 9	Trial 10	Trial 11	Average	SEM
13		0.0906468				0	0.0178851	0.0136984	0.00703468	0.00735529	0.0163478	0.0274526	0.0029612					0.0132479	0.0031329
14		0.091511				10	0.00413322	0.0178538	0.00842903	0.00539937	0.00788586	0.0227532	0.0194015	0.0177026	0.0047757			0.0120371	0.00242816
						30	0.00884508	0.0183695	0.0142535	0.0146914	0.000886467	0.0167766	0.0167727	0.00942711	0.0169268	-0.00134057	-0.00209725	0.0103192	0.00235193
Mean	0.0612959	0.100113	0.00924915	0.00536009		60	0.0114817	0.0075323	0.00970575	0.0166055	0.00522472	0.0125971	0.00873282	-0.00566363	0.0121219			0.00870424	0.00210125
SEM	0.00478569	0.00407153	0.00807364	0.0025811		100	0.0113813	0.00811487	0.00456392	0.00121563	-0.00211901	-0.000659795	-0.00599008	0.0134172	0.00688074	0.023679	-0.00152216	0.00536015	0.00258111
						300	0.0126535	0.00926073	0.0162585	0.0232109	-0.00468129	0.00743232	0.00188972	-0.000138122	0.0143891	0.00259381	0.00587866	0.00806798	0.00245323
						LPC dose dependent initial rate of YO-PRO-1 uptake: Panx1-empty
						[LPC] (uM)	Trial 1	Trial 2	Trial 3	Trial 4	Trial 5	Trial 6	Trial 7	Trial 8	Trial 9	Trial 10	Trial 11	Average	SEM
						0	0.0465616	0.0487921	0.0741502	0.070892	0.0571471	0.00548948	0.0599547					0.0518553	0.00864685
						10	0.0738387	0.0957608	0.072104	0.086851	0.06128	0.0973544	0.0706222	0.0216782	0.0725232			0.0724458	0.00752676
						30	0.11694	0.0587089	0.0708123	0.0815213	0.0931109	0.0528491	0.0688442	0.0960969	0.0620246	0.0457158	0.0977416	0.0767605	0.00667086
						60	0.0930203	0.110825	0.085014	0.126873	0.0783585	0.079	0.0680588	0.0564852	0.0869239			0.0871732	0.00709655
						100	0.0978242	0.0854836	0.0856853	0.0881991	0.111641	0.0946074	0.111635	0.094181	0.133674	0.0669678	0.0930331	0.0966301	0.00525885
						300	0.115006	0.097302	0.0803558	0.121578	0.166604	0.133334	0.15289	0.175624	0.128836	0.0691236	0.0828201	0.120316	0.0107397
