# Supplementary material for: ATP-release pannexin channels are gated by lysophospholipids
Source: eLife. 2025 May 1;14:RP107067. doi: 10.7554/eLife.107067 (PMC12045621; doi:10.7554/eLife.107067)
Supplement: Figure 5—source data 1. [file elife-107067-fig5-data1.xlsx]

## Sheet: Fig. 5
Fig. 5b					Fig. 5c					Fig. 5D								Fig. 5E											Fig. 5F
Trial #	V+sPLA1	hPanx1+sPLA1	hPanx1+sPLA1 + CBX		Trial #	V+sPLA2	hPanx1+sPLA2	hPanx1+sPLA2 + CBX		Trial number	Panx1 alone	Panx1 +LPC	Panx1 +AA	Panx1 +AEA	Panx1 +PGE2	Panx1 +PGI2		Trial number	Vector	Panx1	Panx1 +CBX	Panx1 +QCT	Panx1 +CZP	Panx1 +PP2	Panx1 +ZVAD	Vector	Panx2		Mild
1	0.00138286	0.103173	0.0315078		1	0.0064485	0.033352	0.020711		1	0.0173689	0.0644007	0.028368	0.00493467	0.00840013	0.00371131		1	0.009167	0.134066	0.0124777	0.0295716	0.0541169	0.160697	0.0747513	0.0315679	0.0151841		ID	Name	YOPRO-1 uptake
2	0.00240434	0.120582	0.0355118		2	-0.0020832	0.033974	0.017552		2	0.0234635	0.0591467	0.0275679	0.00781837	0.00751133	0.00436357		2	0.008485	0.135018	0.0230759	0.0458483	0.0831993	0.117654	0.0953334	0.0228504	0.0223947		319022	Abby Rice	0.021131
3	5.45389e-06	0.0996621	0.0228178		3	-0.0065157	0.031005	0.017832		3	0.0243469	0.0625253	0.0191673	0.00903673	0.00502995	0.000790324		3	0.004792	0.081458	0.0219734	0.0468403	0.04491	0.118318	0.111637	0.0468298	0.0225195		319392	Charlie Mikolajczyk	0.41503
4	-0.00256139	0.099228	0.0241648		4	0.0031522	0.041278	0.02906		4	0.0198884	0.0719678	0.0159478	0.00593977	0.011514	0.00683409		4	0.008958	0.089845	0.0121936	0.0217253	0.0500476	0.15537	0.114526	0.0280854	0.0224462		275890	Maximus Amalfi	0.06738
					5	0.0093982				5	0.00606374	0.0505706	0.0117098					5	0.013943	0.103337	0.00864393	0.020575	0.0240422	0.146273	0.138175				260098	Emma Joy Simmonns	0.33
Mean	0.000307814	0.105661	0.0285006		6	0.010207				6	0.0194825	0.0546805	0.0061051					6	0.009286	0.138019			0.0323311	0.128574	0.105725				267737	Viola Hale	0.080375
SEM	0.00107529	0.00505133	0.00301791							7	0.00349297	0.0391691	0.00650238					7	0.001941	0.124981			0.0369625						299093	Kobi Pupo	0.086505
					Mean	0.0034345	0.0349023	0.0212888		8	0.000111732	0.069957						8	0.00438	0.094275									224076	Cassie Andre	0.21584
					SEM	0.00270831	0.0022193	0.00268698		9	0.00496208	0.066122						9	0.010661	0.08226									323729	Mark Gelvitz	0.21975
										10	0.019894	0.0434618						10	0.013001	0.087806									314696	Walter Merry	0.32649
Trial #	V+sPLA1	hPanx2+sPLA1			Trial #	V+sPLA2	hPanx2+sPLA2			11	0.00607527	0.0537569						11	0.006488	0.108235									286959	Maverick	0.1366
1	-0.00147522	0.0346396			1	0.0676695	0.135955			12		0.0519777						12	-0.00197	0.17569									303727	Winifried Rosenthal	0.2151
2	-0.00114423	0.0390298			2	0.0564284	0.166482			13		0.0406774						13	0.001907	0.089973									318429	Chuck	0.080551
3	-0.000309525	0.0452988			3	0.0569919	0.165082			14		0.0488913
4	3.00274e-05	0.048482			4	0.0564076	0.191			15		0.0423638																	Moderate-Severe
5	0.00148065	0.0386959			5	0.0587413	0.170773											Mean	0.007003	0.111151	0.0156729	0.0329121	0.0465157	0.137814	0.106691	0.0323334	0.0206361		ID	Name	YOPRO-1 uptake
6	0.00114395	0.0308352			6	0.0627628	0.231291											SEM	0.00128496	0.00788188	0.00288289	0.00570022	0.00726381	0.00769268	0.00861624	0.0051535	0.00181752		316080	Bonnie Unger	0.75843
7	0.00341778	0.0337431								Mean	0.0131955	0.0546446	0.0164812	0.00693238	0.00811385	0.00392482													316912	Maya Motsko	0.42993
8	0.00152715	0.0331513			Mean	0.0598336	0.176764			SEM	0.00271539	0.00277051	0.00345625	0.000921475	0.00133905	0.00124254													235675	Nittany Brundza	0.31188
					SEM	0.00226476	0.0159989																						217767	Kiyo Alman	0.53261
Mean	0.000583823	0.0379844																											322348	Heidi Girodano	0.5999
SEM	0.000572741	0.00219148								Trial number	Panx2 alone	Panx2 +LPC	Panx2 +AA	Panx2 +AEA	Panx2 +PGE2	Panx2 +PGI2													294837	Nina Simanis	0.46823
										1	0.0234862	0.0750557	0.0304191	0.00703634	0.0300775	0.0234613													312844	Sky Shippee	0.49365
										2	0.0261372	0.0291601	0.0166633	-0.0119404	0.013377	0.0208368													254187	Louis Bridge	0.44291
										3	0.0255569	0.0386131	0.0336876	0.0192867	0.0107437	0.0184118													262038	Leia Campanale	0.43826
										4	0.0325097	0.0616254	0.0363441	0.0257164	0.0281938	0.0203229													327204	Blue Lecuyer	0.42185
										5	0.0188602	0.0581613	0.000118952	-0.0180801
										6	0.0204743	0.0604547	0.000118952	-0.0164751
										7	0.0204334	0.0409707
										8	0.0101017	0.038225
										9		0.0554361
										Mean	0.022195	0.0508558	0.0195587	0.000923971	0.020598	0.0207582
										SEM	0.00230813	0.00492435	0.00674171	0.00778587	0.0049733	0.00104117
