# Supplementary material for: ATP-release pannexin channels are gated by lysophospholipids
Source: eLife. 2025 May 1;14:RP107067. doi: 10.7554/eLife.107067 (PMC12045621; doi:10.7554/eLife.107067)
Supplement: Figure 6—source data 1. [file elife-107067-fig6-data1.xlsx]

## Sheet: Fig. 6
Fig. 6C					Fig. 6D
	cleaved IL-b signal	relative signal				pro-IL-1b signal	relative to LPS-only
cntrl LPS	1394.13	1			cntrl LPS	5633.42	1.13356
cntrl lpc-1	15838.8	11.4			cntrl lpc-1	3941.52	0.793117
cntrl lpc-2	12663.1	9.1			cntrl lpc-2	2988.15	0.60128
cntrl lpc-3	12929.6	9.3			cntrl lpc-3	3868.4	0.778404
kd-1	9572.73	6.9			kd-1	5424.05	1.09144
kd-2	8696.66	6.2			kd-2	5779.76	1.16301
kd-3	6744.42	4.8			kd-3	7175.83	1.44393
